# Supplementary material
Source: PubMed Central journal article supplement (PMC4254048)
Supplement: NIHMS633903-supplement-3.pdf [file NIHMS633903-supplement-3.pdf]

Figure S1

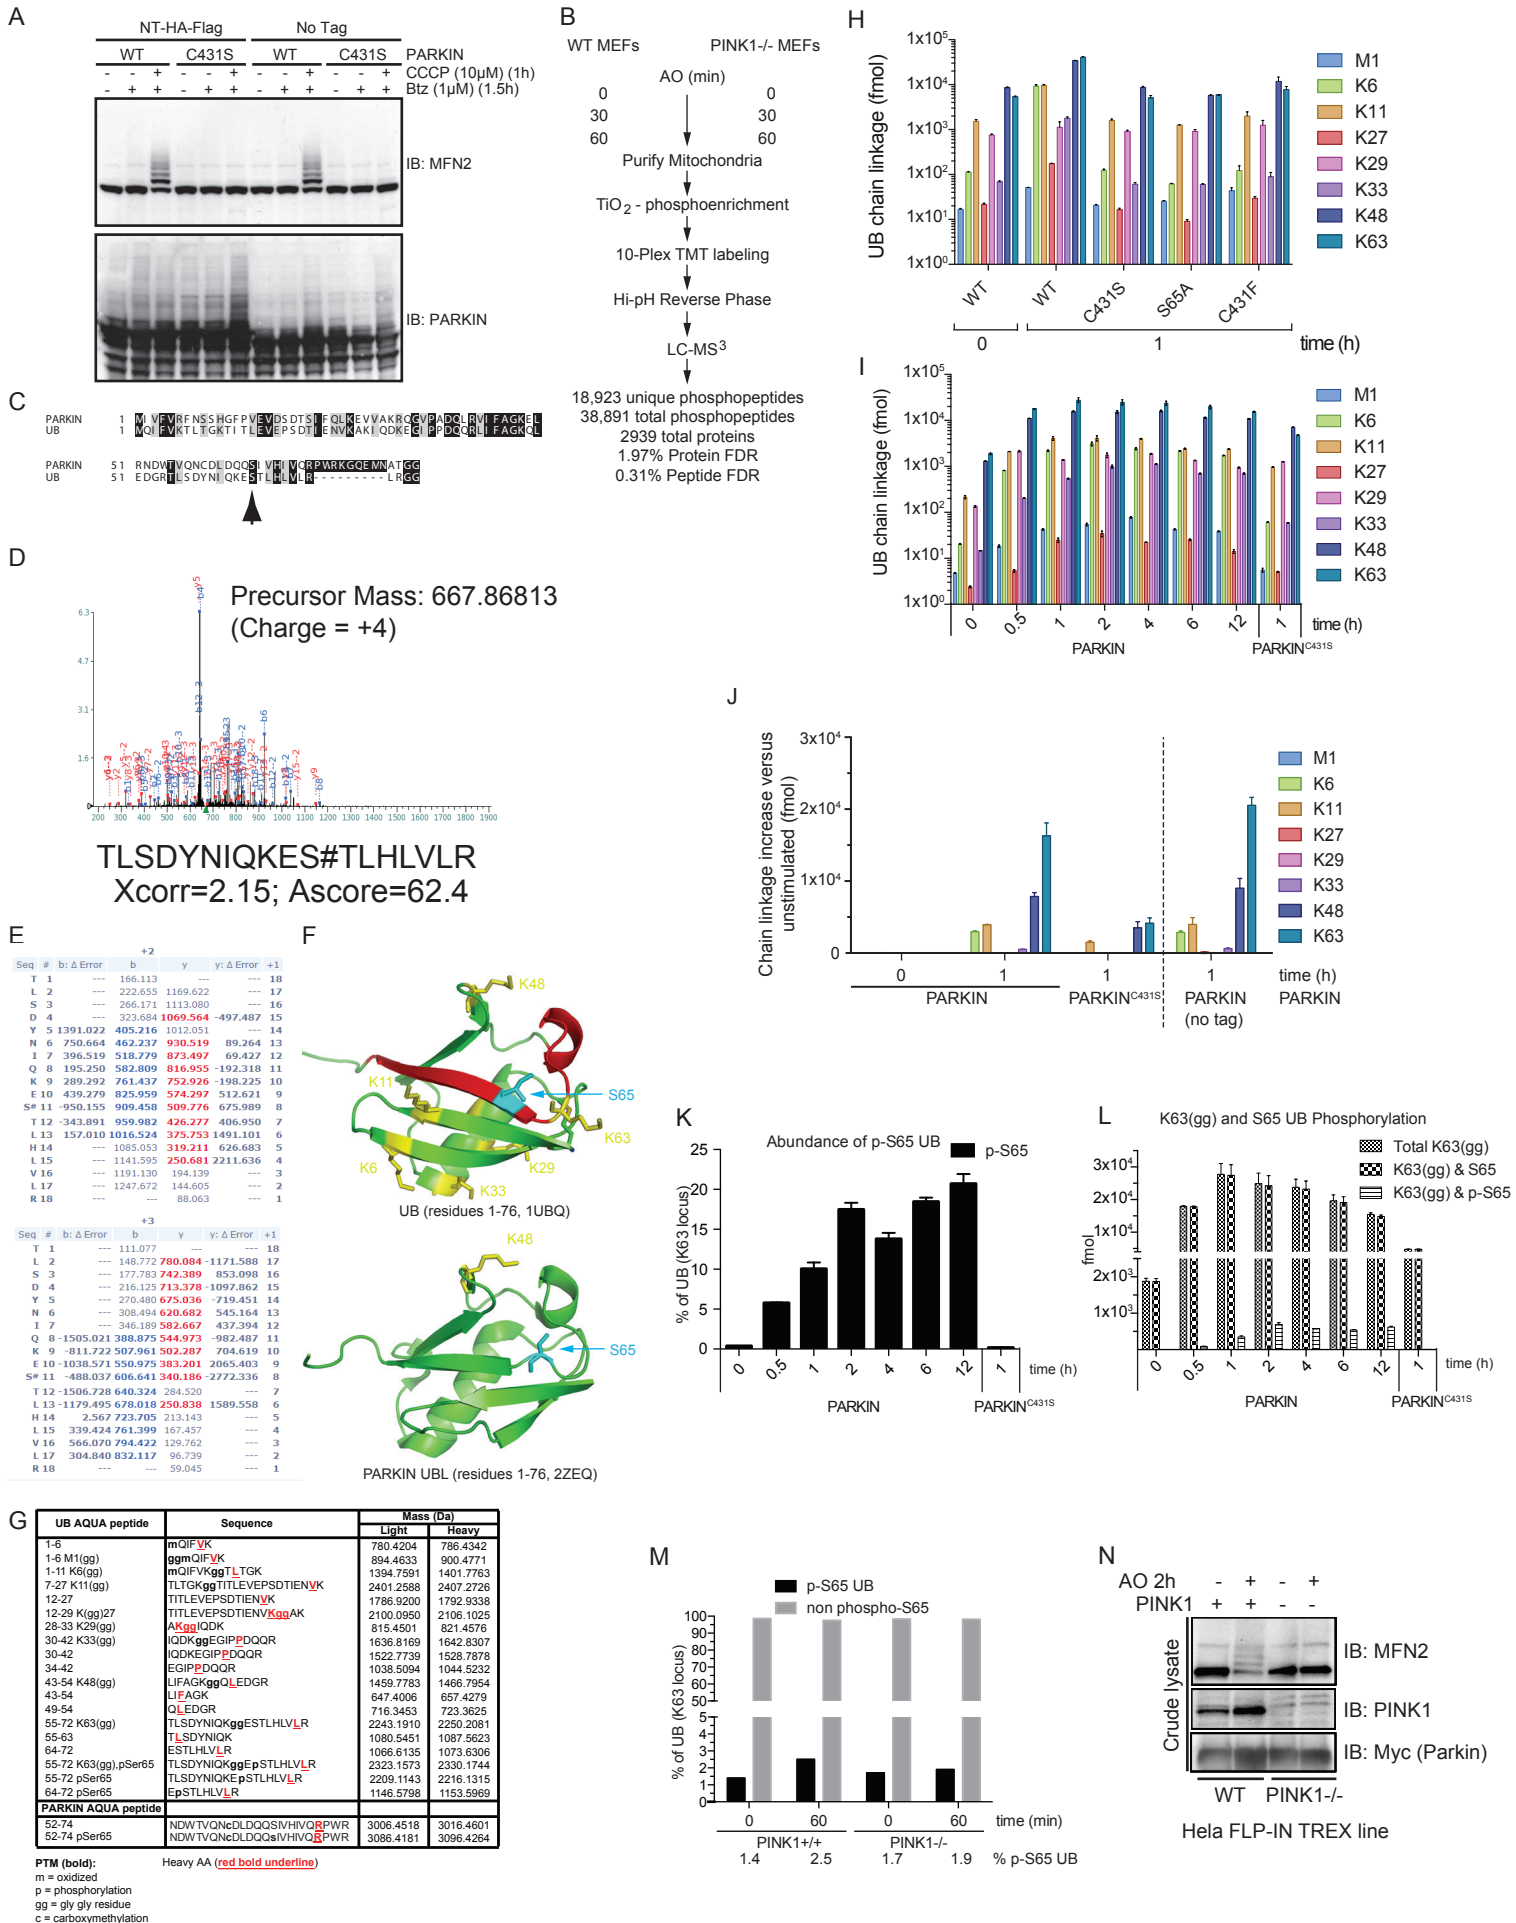

**Figure S1. Application of quantitative proteomics to the PINK1-PARKIN pathway (related to Figure 1).**

(A) HA-FLAG-PARKIN and untagged PARKIN display indistinguishable activities in MFN2 ubiquitylation in vivo. HeLa cells stably expressing HA-FLAG-PARKIN or untagged PARKIN in either the wild-type or catalytically defective (C431S) form were treated with either CCCP, CCCP plus Bortezomib, or left untreated and after 1 h, cell extracts were immunoblotting with anti-MFN2 or anti-PARKIN.

(B) Scheme depicting approach for identification of cellular substrates of PINK1 in response to mitochondrial depolarization.

(C-F) Characterization of S65 UB phosphorylation. (B) Sequence alignment of the UBL domain of human PARKIN (residues 1-84) and UB. Arrow indicates the position of S65 in both PARKIN and UB. (C) MS2 spectra for the p-S65 tryptic peptide from UB (residues 55-72) showing the precursor mass, Xcorr, and Ascore values. (D) Fragment ions identified in the p-S65 UB<sup>55-72</sup> peptide. (E) Structures of UB and PARKIN<sup>UBL</sup>. The position of the tryptic peptide identified in UB is shown in red with S65 in cyan. The position of S65 in PARKIN<sup>UBL</sup> is shown in cyan. The positions of lysine residues are shown in yellow.

(G) AQUA peptides employed in this study.

(H) UB chain linkage abundance in response to mitochondrial depolarization with AO (1h). The number of fmol quantified are shown on a log<sub>10</sub> scale, and error bars represent triplicate measurements (+/- SEM).

(I) UB chain linkage abundance in response to mitochondrial depolarization with AO over a time course of 30 min to 12 h. The number of fmol quantified are shown on a log<sub>10</sub> scale, and error bars represent triplicate measurements (+/- SEM).

(J) UB chain linkage increase in mitochondria from cells depolarized for 1 h with AO and purified by sucrose gradient centrifugation, normalized against mitochondria in the absence of stimulation. Error bars represent triplicate measurements (+/- SEM).

(K) Time course for p-S65 UB on mitochondria in response to depolarization with AO. Error bars represent triplicate measurements (+/- SEM).

(L) Time course for accumulation of doubly modified (K63gg and p-S65) and singly modified K63gg UB peptides in response to mitochondrial depolarization with AO. Error bars represent triplicate measurements (+/- SEM).

(M,N) Stoichiometry of total UB phosphorylation in HeLa Flp-In T-REx cells with and without PINK1. HeLa Flp-In T-REx cells containing an inducible PARKIN gene were used for gene editing with a zinc finger nuclease targeting PINK1. Clones in which PINK1 was homozygously knocked out were identified by PCR (not shown) and by examining PINK1 dependent mitochondrial ubiquitylation with  $\alpha$ -MFN2 (panel N). To examine the stoichiometry of UB phosphorylation (panel M), total cell extracts from cells with or without depolarization were treated with USP2 to collapse all ubiquitin chains to monomers. The sample was then heated to 95°C for 10 min, and UB digested with trypsin prior to AQUA proteomics.

Figure S2

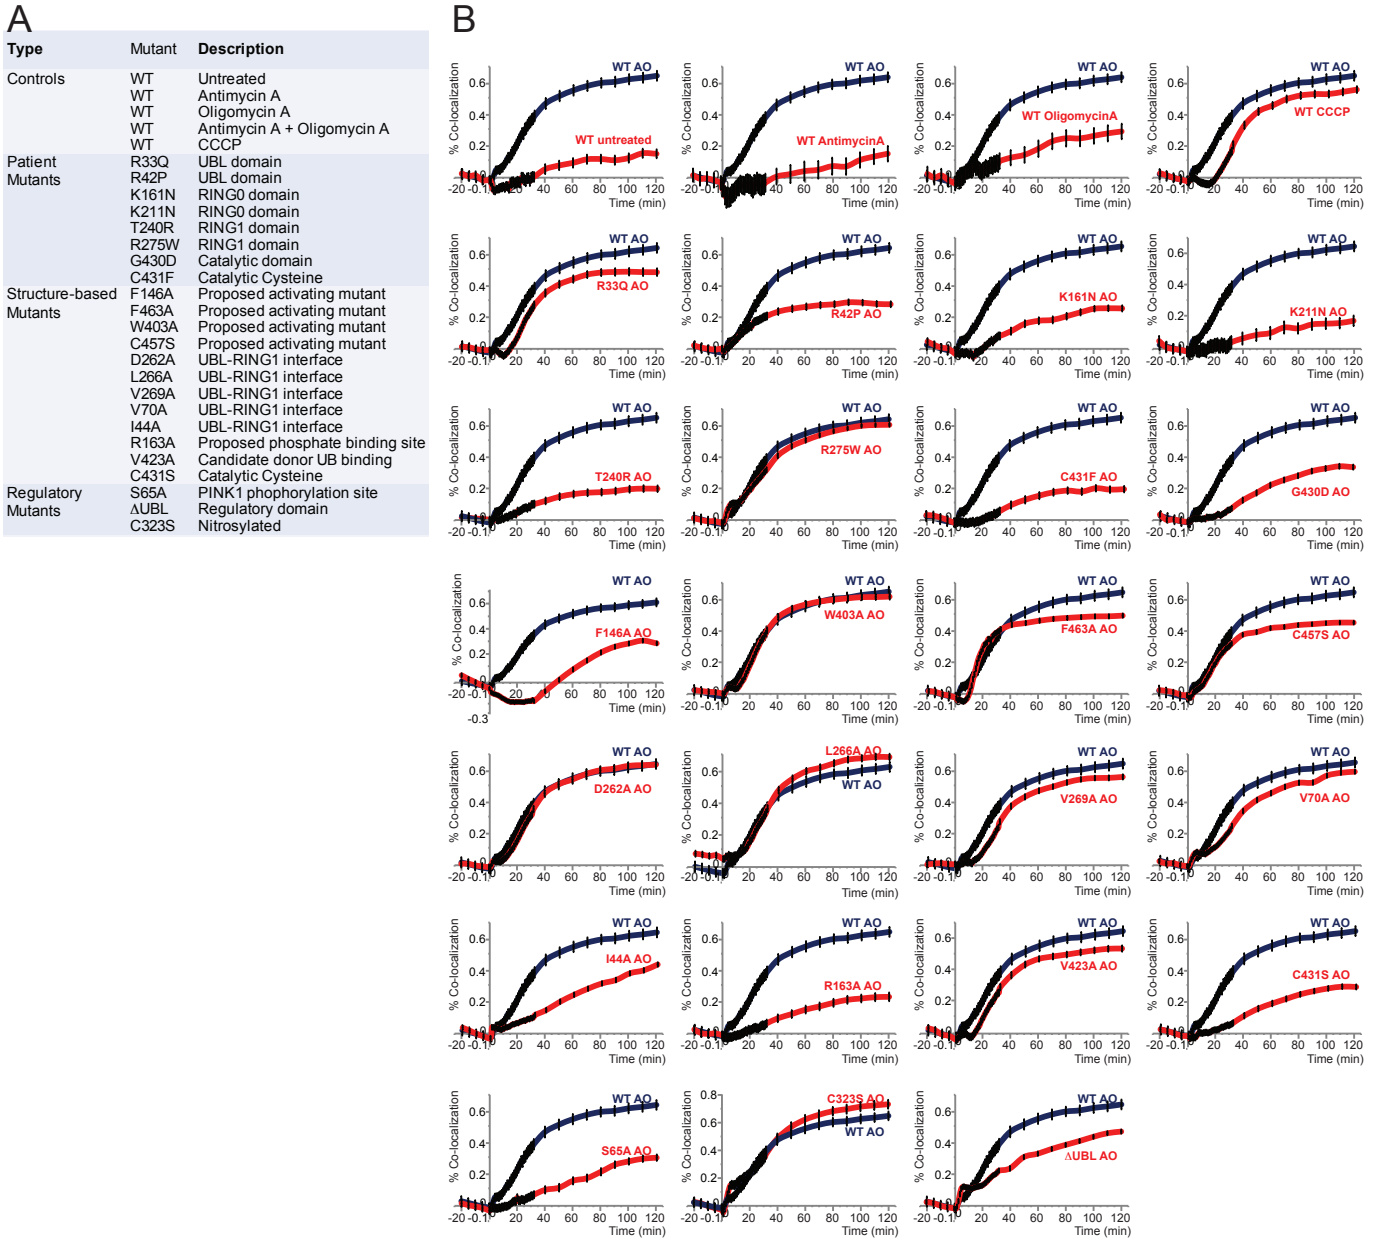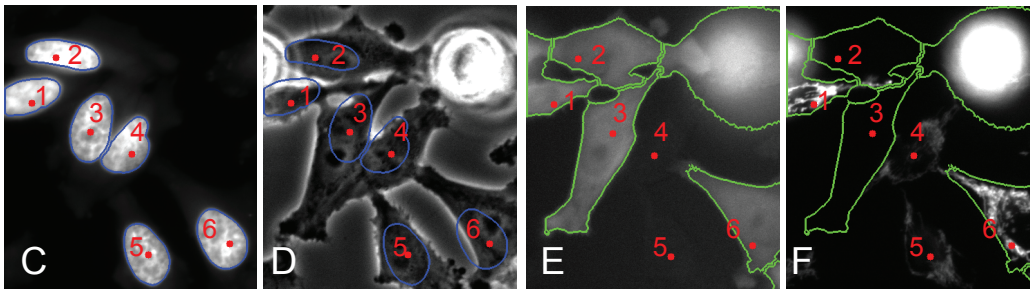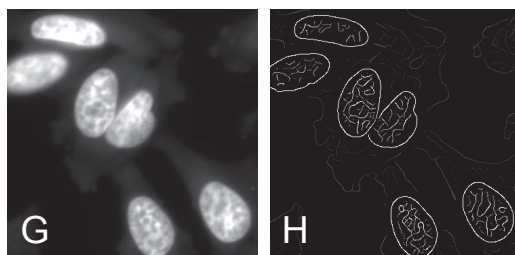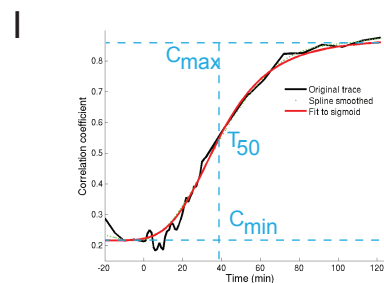

**Figure S2. Kinetics of PARKIN and PARKIN mutant localization to mitochondria in response to depolarization (related to Figure 2).**

(A) Mutants examined in this study.

(B) Plots for % co-localization for PARKIN and individual PARKIN mutants. Error bars represent measurements at individual time points for >300 cells (+/- SEM).

(C-F) A cropped image illustrating the image segmentation procedure. Red dots are the manually defined seeding points. All images are from the first frame of the movie except panel C, which is from the fixed image acquired after the last frame of the movie. (C) Nuclear segmentation using the DAPI image from the end of the movie. (D) Overlay nuclear mask on the phase contrast channel from the first frame of the movie. (E) Cell segmentation using the GFP-PARKIN channel. (F) Overlay cell mask on the mitochondria channel.

(G,H) Steerable filtering to identify nuclear boundary in the DAPI images. (G) Original DAPI image. (H) Non-maximum suppressed response from the steerable filter.

(I) A typical time trace of correlation coefficient from a cell undergoing Parkin translocation. The black line is original trace, green dotted line is the spline smoothed trace, and the red solid line is the result from a constrained fitting to sigmoid curve.  $C_{\min}$  and  $C_{\max}$  are the values of the asymptote on both ends of the fitted curve, while T50 is the time point where the fitted curve reaches 50% of the maximum.

Figure S3

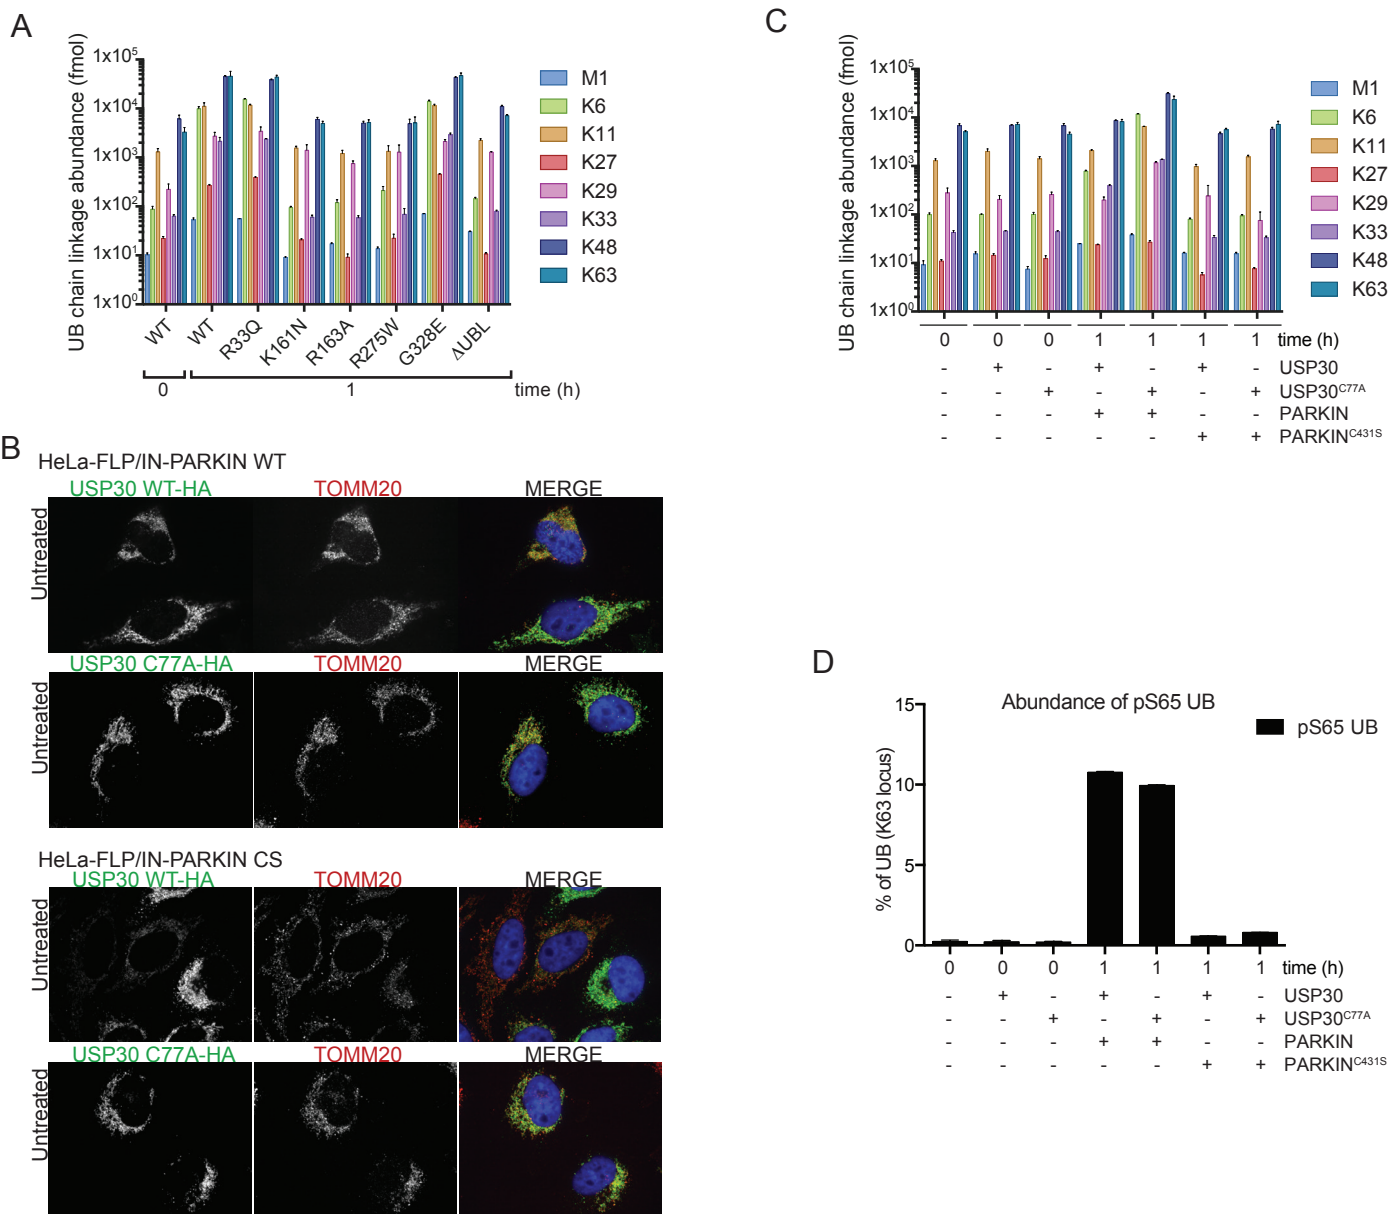

**Figure S3. Mitochondrial UB chain synthesis by patient and structure-based PARKIN mutants and reversal by USP30 (related to Figure 3).**

(A) Absolute UB chain linkage abundance in HeLa Flp-In T-REx cells expressing the indicated PARKIN protein with or without depolarization for 1h was determined by UB-AQUA proteomics. Error bars represent triplicate measurements (+/- SEM).

(B) Immunofluorescence of HeLa Flp-In T-REx cells engineered to express inducible untagged PARKIN and either USP30-HA or USP30<sup>C77A</sup>-HA constitutively.  $\alpha$ -HA staining is in green.  $\alpha$ -TOMM20 was used as a mitochondrial marker.

(C) Absolute UB chain linkage abundance in HeLa Flp-In T-REx cells engineered to express inducible untagged PARKIN and either USP30-HA or USP30<sup>C77A</sup>-HA constitutively with or without depolarization for 1h was determined by UB-AQUA proteomics. Error bars represent triplicate measurements (+/- SEM).

(D) Absolute abundance of p-S65 is largely unaltered in UB chains targeted by USP30.

Figure S4

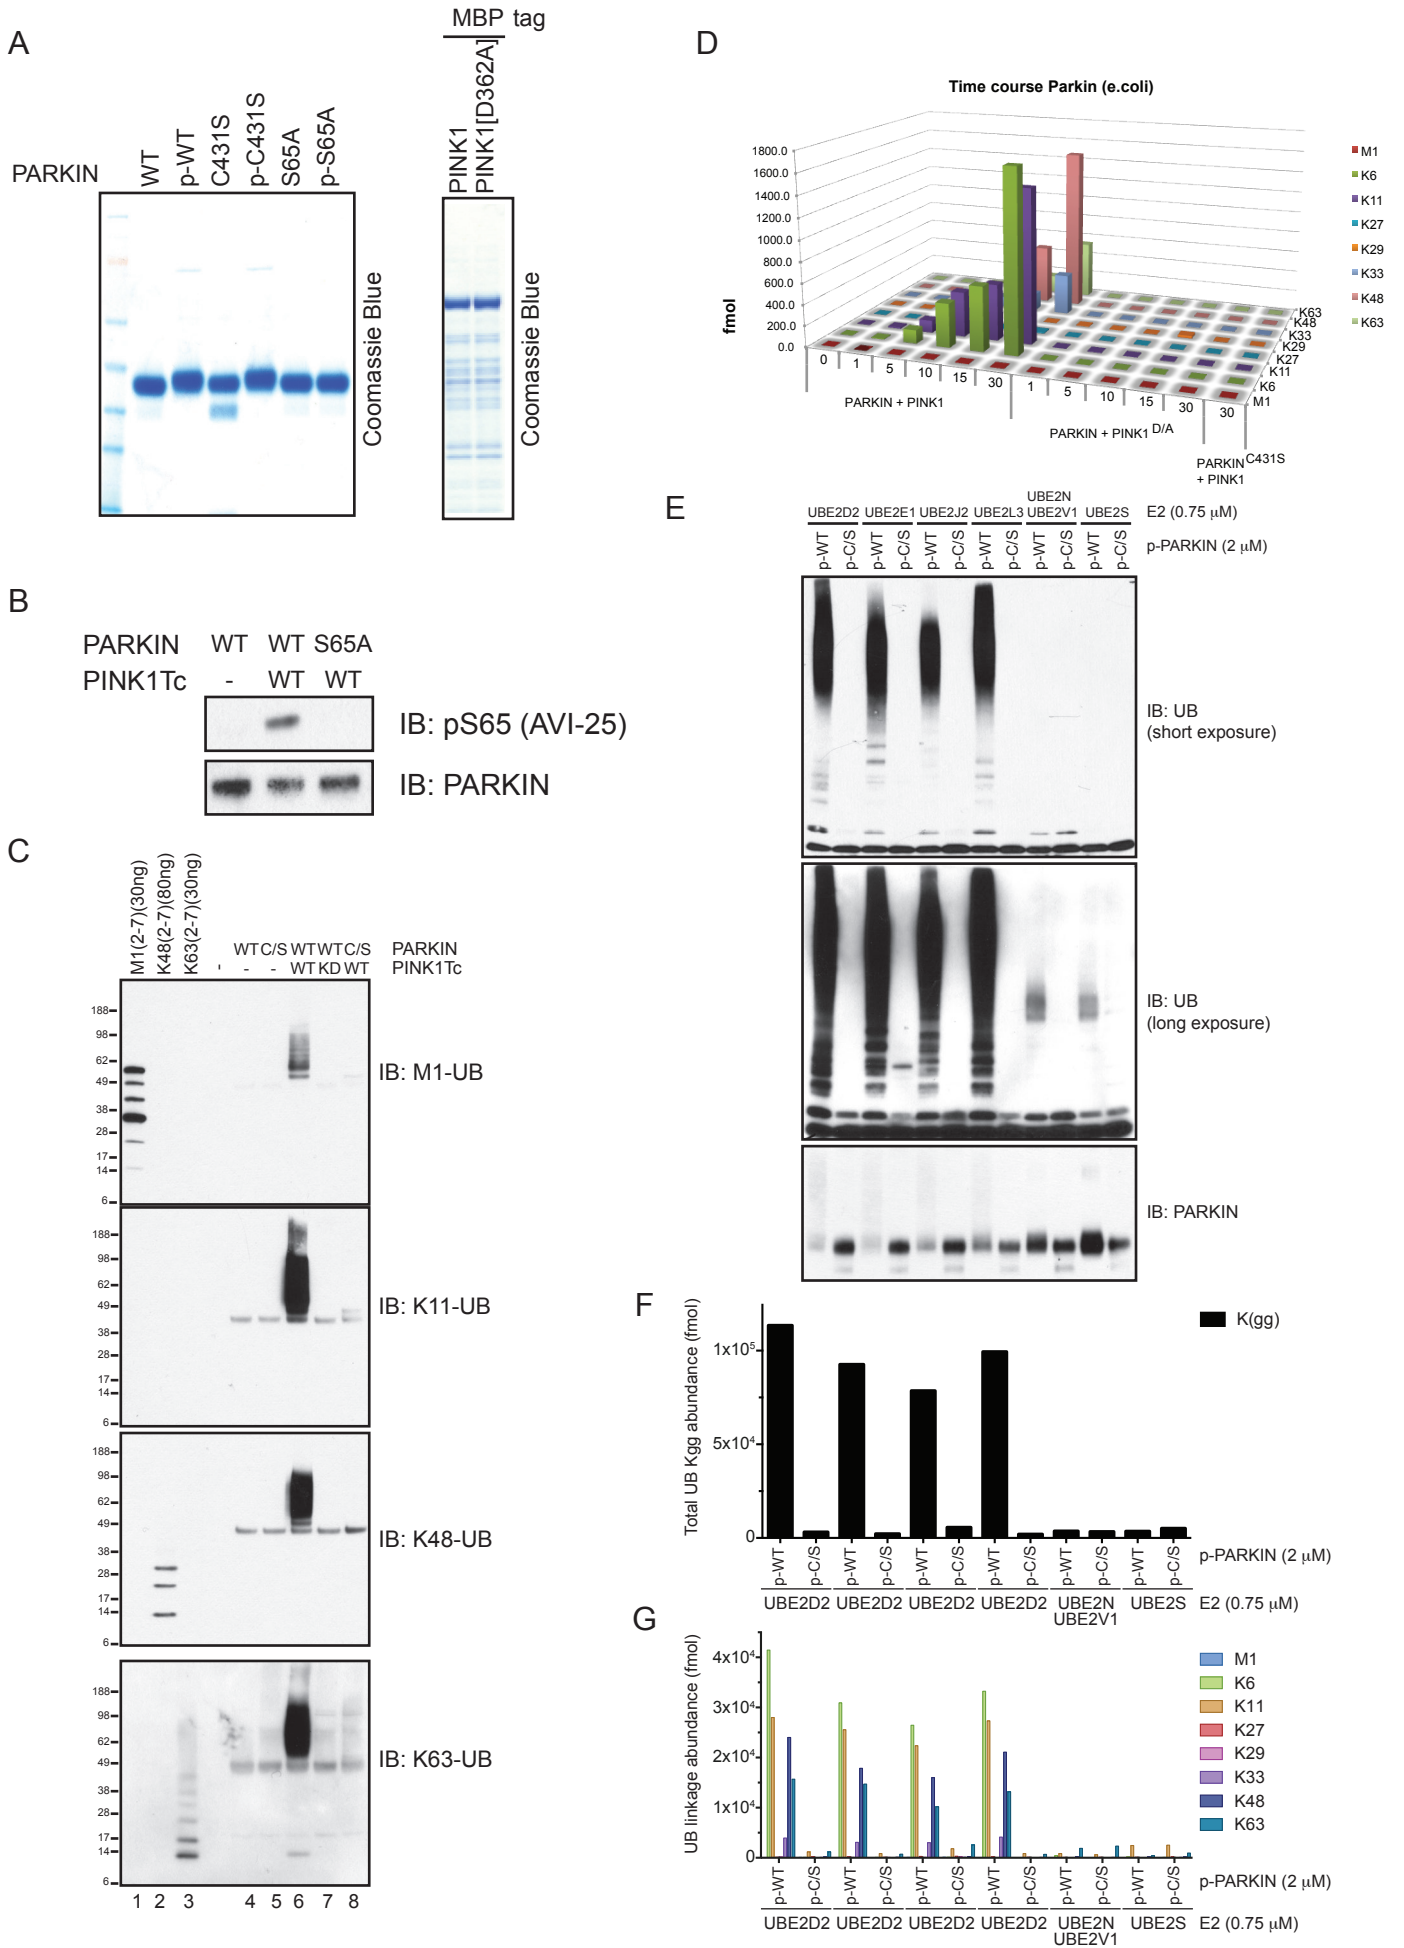

**Figure S4. In vitro analysis of PARKIN activity upon phosphorylation by PINK1Tc (related to Figure 4).**

(A) Purified PARKIN proteins with or without phosphorylation by PINK1. Proteins were detected by Coomassie staining in SDS-PAGE gels. PARKIN proteins were purified away from PINK1 as described in Supplemental Experimental Procedures (Method 1).

(B) Characterization of the AVI-25  $\alpha$ -pS65 PARKIN antibody selected by phage display (see Supplemental Experimental Procedures). WT or S65A PARKIN was purified from insect cells and either left untreated or treated with PINK1Tc produced in *E. coli*. Proteins were then separated by SDS-PAGE and immunoblotted with either  $\alpha$ -PARKIN antibodies or with AVI-25, a single chain antibody selected for binding to a p-S65 PARKIN peptide as described in Supplemental Experimental Procedures.

(C) Immunoblotting of in vitro PARKIN UB chain assembly reactions using  $\alpha$ -M1,  $\alpha$ -K11,  $\alpha$ -K48 and  $\alpha$ -K63 UB chain specific antibodies.

(D) UB-AQUA analysis of chain assembly reactions produced using PARKIN purified from *E. coli* and activated by phosphorylation with wild-type or kinase inactive (D/A) PINK1Tc. PARKIN<sup>C431S</sup> prepared similarly was used as a negative control.

(E) Immunoblotting analysis of in vitro UB chain assembly reactions (30 min) using phosphorylated (99%) PARKIN wild-type (p-WT) or inactive mutant PARKIN<sup>C431S</sup> (p-C/S) in combination with various E2 conjugating enzymes.

(F, G) Samples from panels E were subjected to UB-AQUA proteomics.



Figure S5

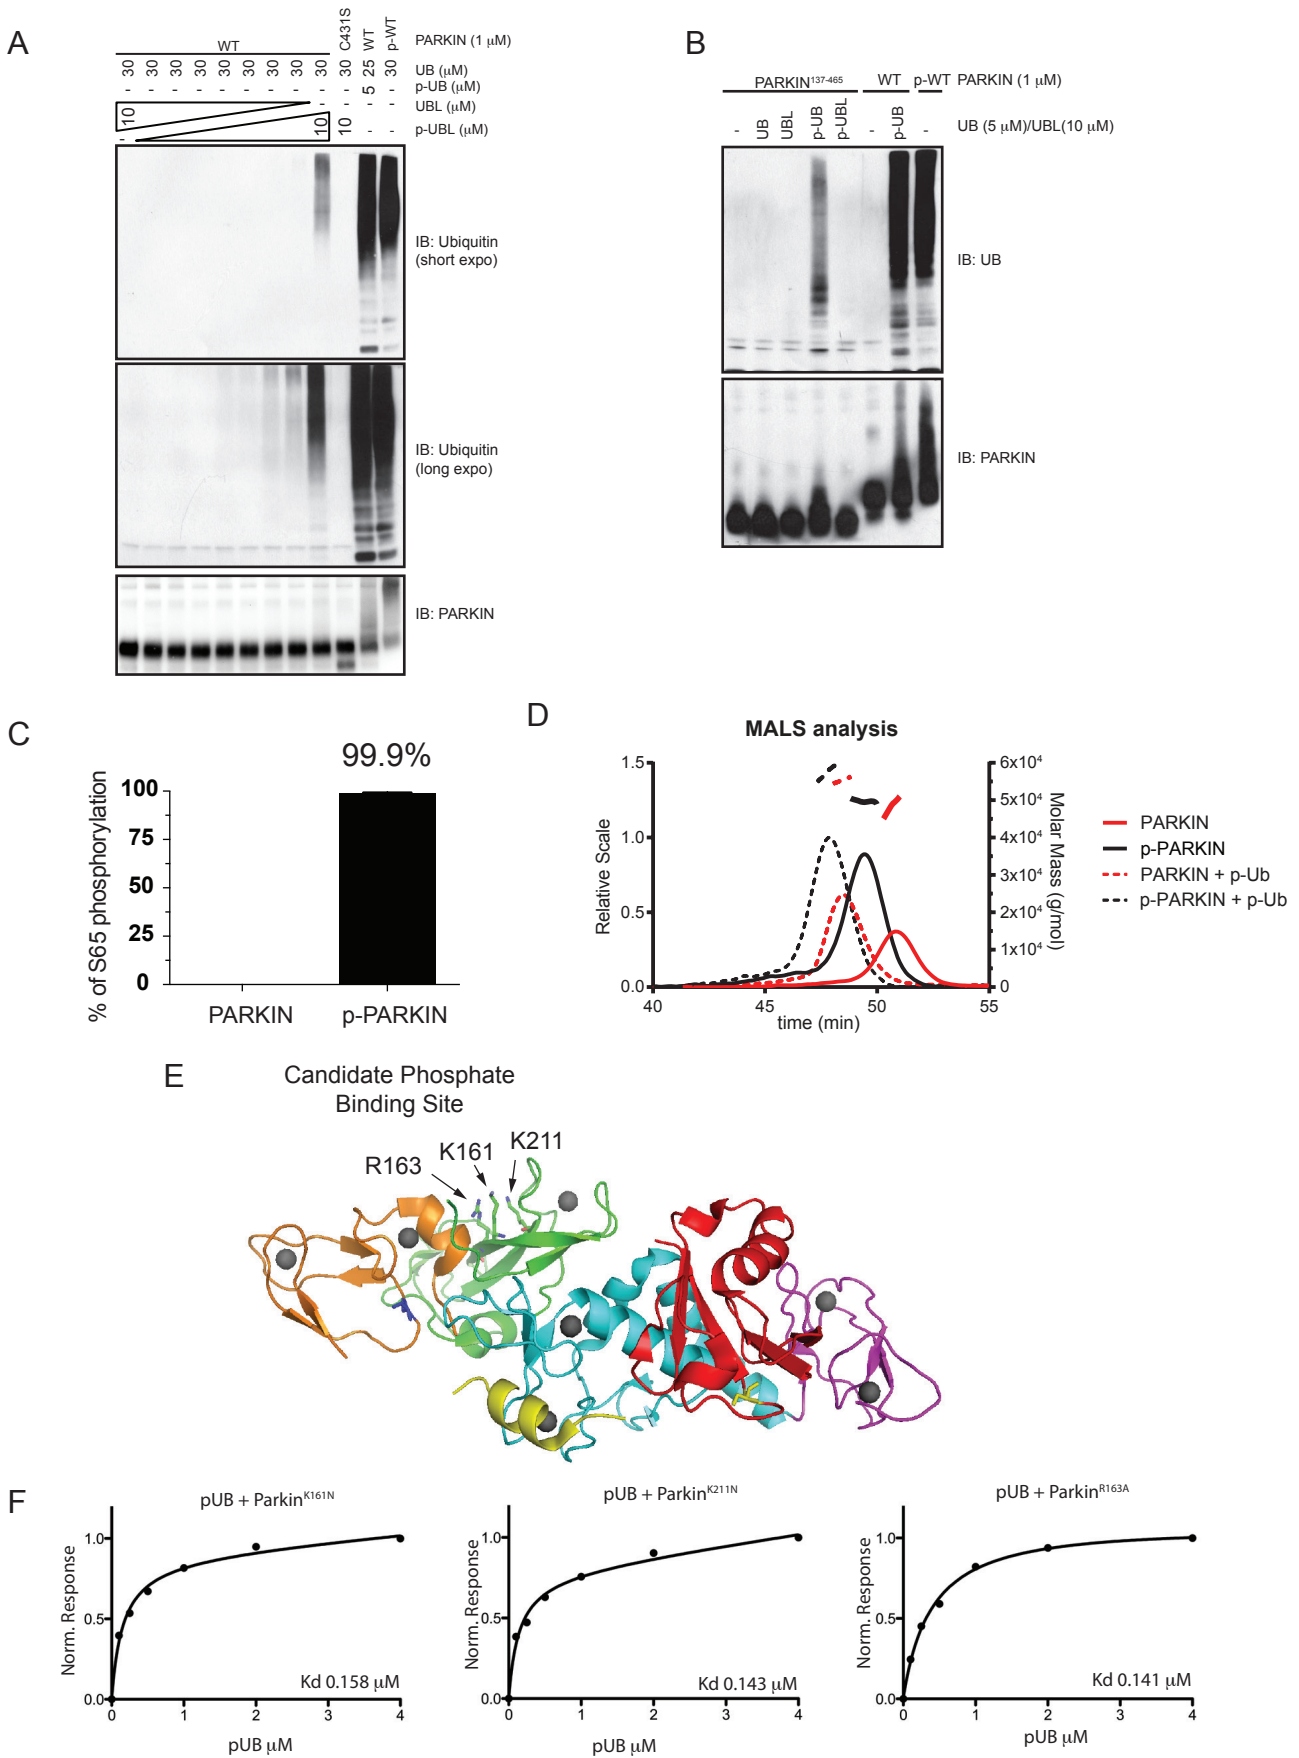

**Figure S5. Biophysical analysis of the interaction of PARKIN with p-UB (related to Figure 5).**

(A) Activation of UB chain synthesis by full length PARKIN (30 min reaction) upon addition of stoichiometrically PINK1-phosphorylated UBL domain (p-UBL) from rat PARKIN. The concentrations of p-UBL used in panel were 0, 0.1, 0.25, 0.5, 1, 2, 3.5, 5, 10  $\mu\text{M}$ . The total UBL concentration was 10  $\mu\text{M}$  and total UB concentration 30  $\mu\text{M}$ .

(B) Activation of UB chain synthesis by PARKIN<sup>UBL</sup> (residues 137-465) (30 min reaction) upon addition of stoichiometrically PINK1-phosphorylated UBL domain (p-UBL) from rat PARKIN or UB (p-UB). The total UB concentration was 30  $\mu\text{M}$ .

(C) AQUA proteomics was used to determine the stoichiometry of PARKIN phosphorylation by PINK1 (Method 2, see Supplemental Experimental Procedures).

(D) Time traces for SEC-MALS analysis of PARKIN proteins with and without phosphorylation by PINK1Tc and in the presence of absence of p-UB (premixed at a 1:5 PARKIN:p-UB molar ratio). The p-PARKIN and p-UB used for these experiments were 99% phosphorylated based on AQUA proteomics.

(E) Structure of auto-inhibited PARKIN (Trempe et al., 2013) showing the positions of R163, K211, and K161 suggested to be involved in phosphate binding (Wauer and Komander, 2013). Color code: UBL domain, red; RING0, green; RING1, cyan; IBR, magenta; REP, yellow; RING2, orange.

(F) Binding of p-UB (99% phosphorylated) to PARKIN mutants was measured using Bio-layer interferometry.

Figure S6

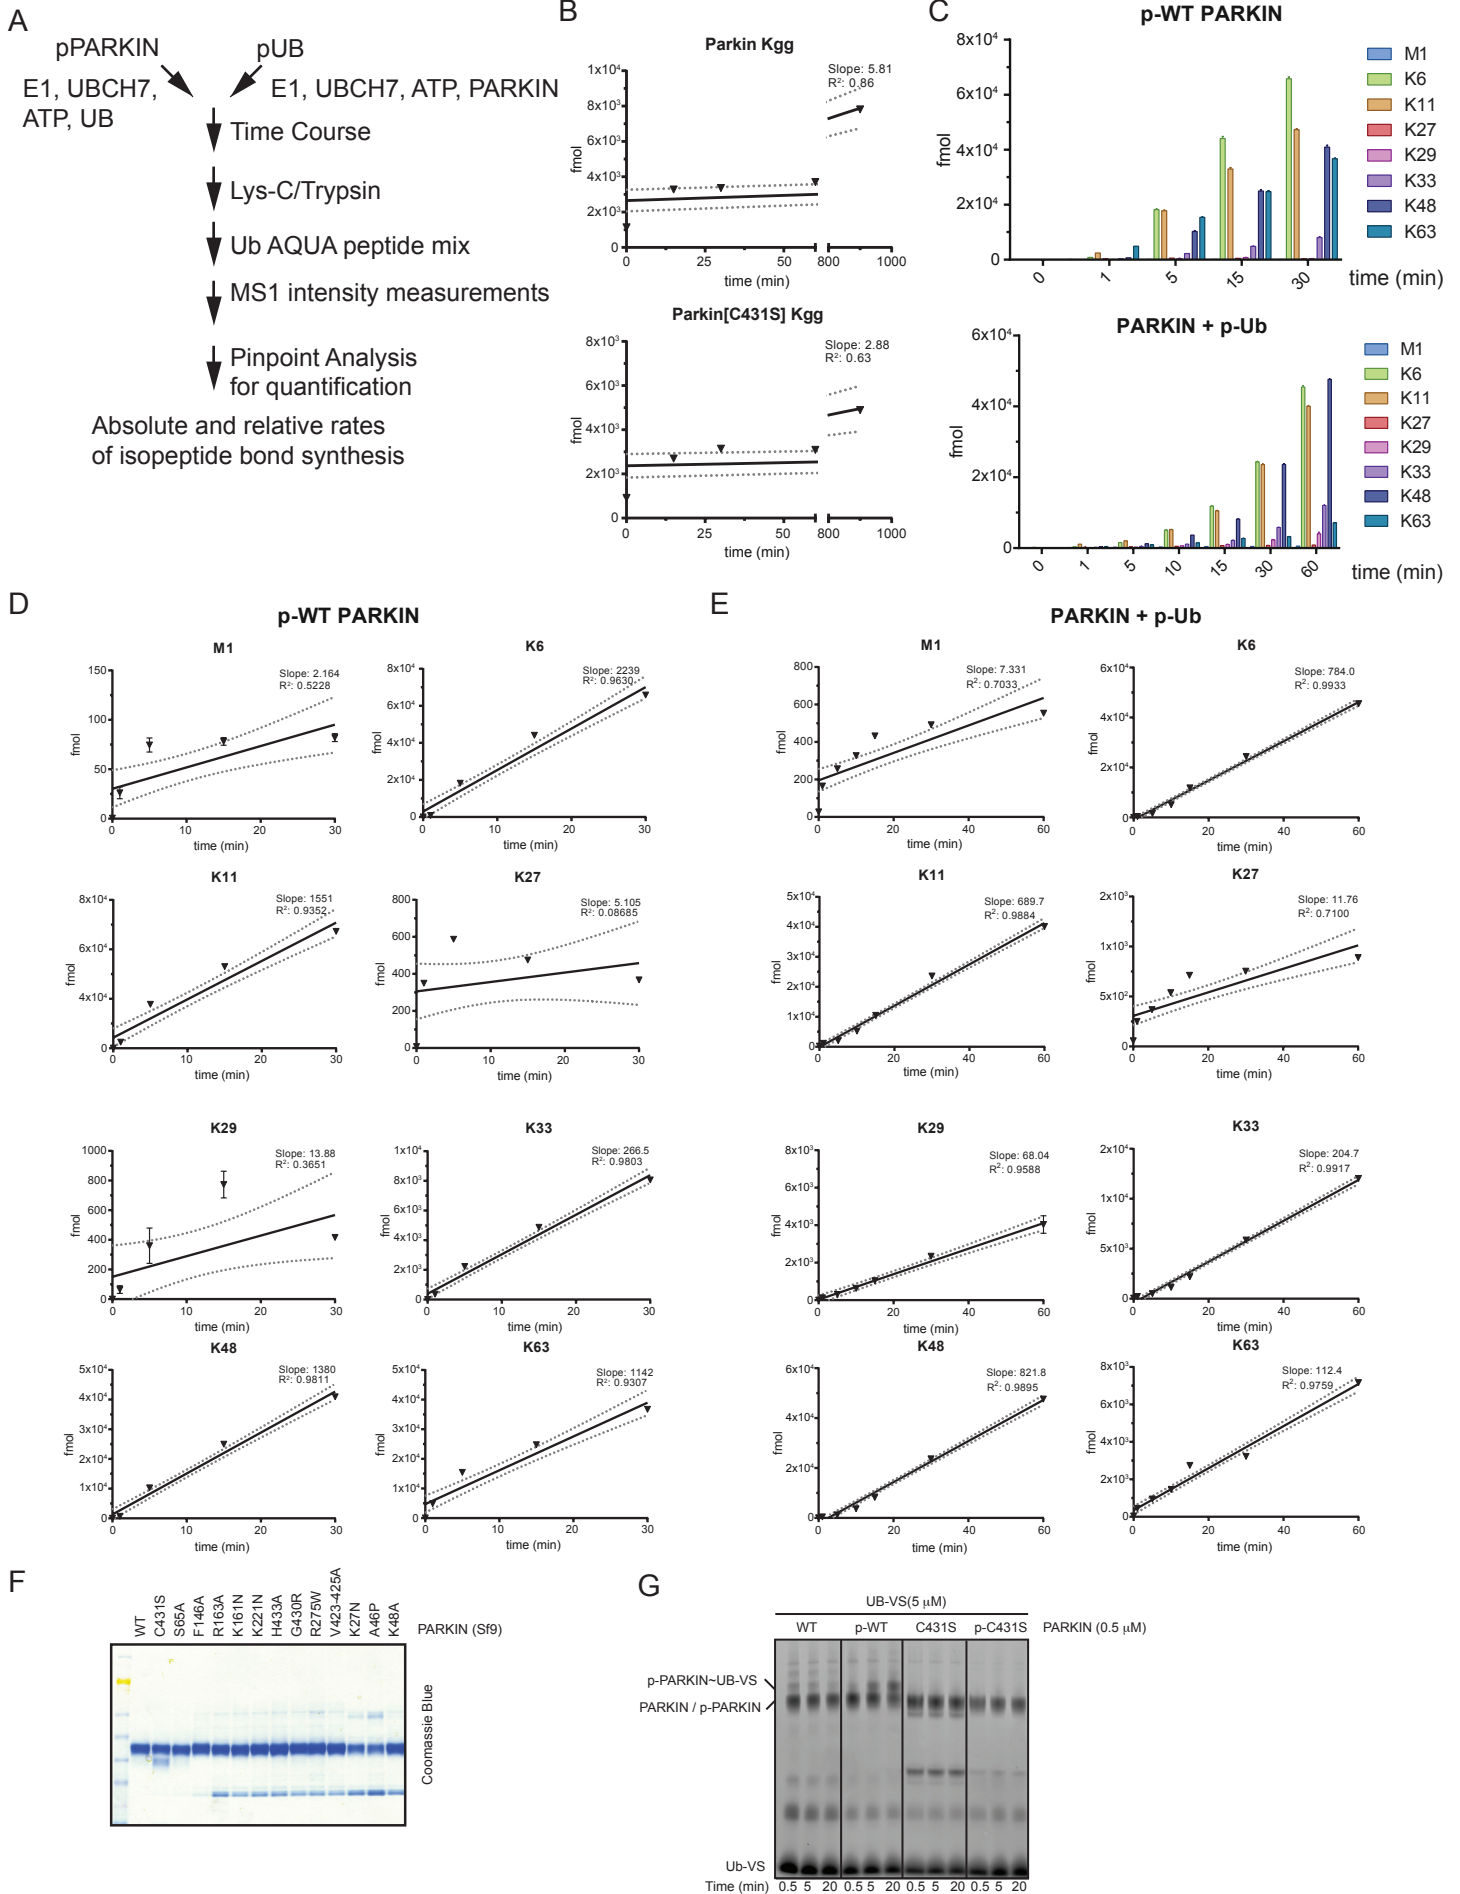

**Figure S6. Analysis of PARKIN UB chain synthesis kinetics using UB-AQUA proteomics (related to Figure 6).**

(A) Schematic representation of the approach used to measure PARKIN rate constants for chain assembly.

(B) Kinetics of formation of UB conjugates for unphosphorylated WT or C431S PARKIN. Each point represents the average of triplicate measurements.

(C) Histogram showing the number of fmol of each chain type formed by p-WT PARKIN or unphosphorylated PARKIN plus p-UB.

(D,E) Velocity plots for each UB chain type formed by p-WT PARKIN (D) or unphosphorylated PARKIN plus p-UB (E). Dotted lines represent the 95% confidence intervals for the calculated slope (rate of UB conjugation) and  $R^2$ .

(F) Coomassie Blue analysis of various PARKIN proteins used in this study after separation by SDS-PAGE.

(G) WT or C431S PARKIN with or without phosphorylation (99%) was incubated with UB-VS for the indicated times and reaction products examined by SDS-PAGE and stained with SYPRO-Ruby.

## **SUPPLEMENTAL TABLE LEGENDS**

### **Supplemental Table 1 (related to Figure 1).**

This table contains the identity and spectral counts of di-GLY modified mitochondrial proteins identified by LC-MS/MS of ubiquitylated proteins purified from depolarized mitochondria over a time course. This Table also includes the identification of pS65 in UB.

## **SUPPLEMENTAL MOVIE LEGENDS**

### **Movie S1 (related to Figure 2).**

This movie is a live imaging experiment of WT GFP-PARKIN recruitment to mitochondria in response to depolarization. GFP-PARKIN, Green; TOMM20, Red.

### **Movie S2 (related to Figure 2).**

This movie is a live imaging experiment of GFP-PARKINC431S recruitment to mitochondria in response to depolarization. GFP-PARKIN, Green; TOMM20, Red.

## **SUPPLEMENTAL EXPERIMENTAL PROCEDURES**

### **Antibodies and other reagents**

The following antibodies were used in this study: MFN2 ([NIAR164], Abcam), CISD1 (16006-1-AP, proteintech), PCNA (sc-56, Santa-Cruz), TOMM20 (sc-11415, Santa-Cruz), PARKIN (sc-32282, Santa-Cruz, [EPR5024(N)], Abcam), UB (Dako), M1-UB (generously provided by Vishva Dixit, Genentech), K11-UB (Matsumoto et al., 2010, generously provided by Vishva Dixit, Genentech), K48-UB (clone *Apu2*, Millipore,[EP8589] Abcam), K63-UB (clone *Apu3*, Millipore,[EPR8590-448] Abcam), Anti-HA (11867423001, Roche), Anti-Flag M2 (F1804, Sigma) and anti-His (631212; Clonotech) and Neutravidin-HRP (Pierce) was used to detect pS65-PARKIN antibody.

Recombinant HA-UB-VS, E1, UBE2D2, UBE2E1, UBE2J2, UBE2L3, UBE2N/UBE2V1, UBE2S, OTULIN, OTUB1, AMSH, and Cezanne deubiquitylating enzymes, as well as K48 and K63 UB chains were generously provided by Francesco Melandri (Boston Biochem, Cambridge MA). Ubiquitin (U6253), Antimycin A (A8674) and Oligomycin A (75351) were from Sigma. Phos-Tag gels were from Wako chemicals.

### **Cell culture, immunoblotting, and mitochondrial protein isolation**

HeLa Flp-In T-REx cells (generously provided by Brian Raught, Ontario Cancer Institute) were grown in DMEM with 10% fetal calf serum, 15µg/ml Blasticidin and 100µg/ml Zeocin. The indicated PARKIN proteins and mutants ( $\Delta$ UBL correspond to PARKIN<sup>81-465</sup>) were transferred from pDNR221-based plasmids into either pcDNA5-FRT/TO-FLAG-HA-Gateway-FRT-Hygromycin based vectors (or the corresponding GFP-tagging vector) using  $\lambda$  recombinase in vitro and these plasmids transfected into HeLa Flp-In T-REx cells followed by selection with Hygromycin (200ug/ml) instead of 100µg/ml Zeocin. To induce protein expression, cells were treated with 0.5 µM doxycycline (DOX) for 16 h to

induce low levels of PARKIN proteins. Cells were either left untreated or depolarized with a mixture of Antimycin A (10  $\mu$ M) and Oligomycin A (5  $\mu$ M) for the indicated time period. Where noted CCCP (10  $\mu$ M) was also used for depolarization. At the indicated times, cells were washed twice with ice cold PBS and lysed in lysis buffer (50 mM Tris/HCl pH 7.5, 1 mM EDTA, 1 mM EGTA, 50 mM NaF, 5 mM sodium pyrophosphate, 10 mM sodium 2-glycerol 1-phosphate, 1mM sodium orthovanadate, 0.27M sucrose, 1% (v/v) NP-40, 1  $\mu$ g/ml aprotinin, 1  $\mu$ g/ml leupeptin and 1 mM PMSF), to produce whole cell extracts.

Crude mitochondria was purified after 2 two wash in ice cold PBS by scrapping cells in PBS containing 200 mM chloroacetamide (3 ml per 15 cm dish). Cells were then collected and centrifuged at 450xg for 5 minutes at 4C. Cell pellet was resuspended in 5 ml (per 15 cm dish) mitochondrial isolation buffer (MIB) (50 mM Tris HCl, pH 7.5, 70 mM Sucrose, 210 mM Sorbitol, 1 mM EDTA, 1 mM EGTA, 50 mM NaF, 5 mM sodium pyrophosphate, 10 mM sodium 2-glycerophosphate, 0.2 mM phenylmethylsulphonyl fluoride, 1 mM benzamidine, 1  $\mu$ g/ml Leupeptin & Aprotinin) plus 100 mM chloroacetamide and centrifuged at 1400xg for 5 minutes at 4°C. The cell pellet was re-suspended in 5 ml MIB buffer plus 100 mM chloroacetamide and sonicated twice for 20 seconds at lowest settings. Sample were spun 10 min at 1400xg to remove unbroken cells/debris and supernatant was collected, this correspond to the “total protein” fraction, and transferred into round-bottom tube prior to centrifugation for 10 min at 15000xg. Supernatant which correspond to cytosolic fraction and crude ER fraction was removed and the pellet corresponding to the crude mitochondria fraction was resuspended in 10 ml of MIB buffer plus 100 mM chloroacetamide, prior to centrifugation for 10 min at 15000xg. The mitochondrial pellet was wash two more time and pellet was then lysed in lysis buffer plus 100 mM chloroacetamide. In some experiments, we additionally purified

mitochondria using a sucrose gradient (Bozidis et al., 2007).

Whole cell extracts or mitochondrial extracts were sonicated and clarified by centrifugation (16000xg for 10 min at 4°C) and protein concentrations determined by the Bradford assay. Cell extracts (25 µg) or mitochondrial extracts were separated by SDS/PAGE, transferred to PVDF membranes, and proteins detected by immunoblotting.

Generation of USP30 cell lines were performed essentially as described previously, but with small modifications (Sowa et al., 2009). Briefly, HeLa Flp-In T-REx cells were transduced with a lentiviral vector expressing HA-Flag-USP30 or the catalytically inactive USP30<sup>C77A</sup> mutant, and stable cell lines selected in puromycin. Cells stably expressing USP30 were then used as parental cell line to make untagged PARKIN stable cell line using the Flp-In T-REx system describe earlier.

### **Mitochondrial poly-ubiquitin capture and proteomics**

Mitochondrially-derived ubiquitylated proteins were purified using Halo-4xUBA<sup>UBQLN1</sup>. Briefly, whole cell extracts (1 mg) or mitochondrial extracts (1.5 mg) that were lysed in Lysis buffer containing 100 mM chloroacetamide were incubated at 4°C for 3 hours with 30-50 µl of Halo-4xUBA<sup>UBQLN1</sup> beads (pack volume). Following 4 washes with lysis buffer containing 1M NaCl and one final wash in 10 mM Tris pH 8.0, proteins were released from Halo-4xUBA<sup>UBQLN1</sup> using sample buffer prior to analysis by SDS-PAGE and immunoblotting or by 6M Guanidine HCL when analyzed by mass spectrometry. For immunoblotting, samples were separated on 4-12% Bis-Tris gradient gels. For mass spectrometry, samples were subjected to reduction (10 mM TCEP) and alkylation (20 mM chloroacetamide) followed by TCA precipitation. Samples were digested overnight at 37°C with Lys-C and trypsin (in 100 mM TEAB, 0.1% Rapigest, 10% ACN). Digests were acidified with equal volume of 5% formic acid (FA) to a pH ~ 2, dry down,



resuspended in 5% FA, and subjected to C18 StageTip desalting. Samples were analyzed by LC-MS/MS on an Orbitrap-Elite mass spectrometer to identify ubiquitylation sites in mitochondrial proteins (Table S1) as described previously (Sarraf et al., 2013) or used for AQUA as described below.

### **UB-AQUA proteomics**

UB-AQUA was performed largely as described previously but with several modifications (Phu et al., 2011). A collection of 19 heavy-labeled reference peptides (Figure S1G) each containing a single  $^{13}\text{C}/^{15}\text{N}$ -labeled amino acid was produced at Cell Signaling Technologies and quantified by amino acid analysis. Ub-AQUA peptides from working stocks (in 5% FA) were diluted into the digested sample (in 5% FA) to be analyzed to an optimal final concentration predetermined for individual peptide such that each peptide's intensity would be ranging between  $e^6$ - $e^8$ . Samples and AQUA peptides were oxidized with 0.1% Hydrogen Peroxide for 30 min and subjected to C18 StageTip desalting and remove the hydrogen peroxide and resuspended in 5% FA. Both in vitro and in vivo experiments were performed in triplicate and analyzed sequentially by LC-MS on an Exactive-Orbitrap mass spectrometer equipped with a Thermo Fisher nanospray source, a PAL HTC autosampler for sample handling, and an Accela HPLC pump for liquid chromatography (LC) separations. Nanoliter flow rates across the column were achieved using a flow-split method. Peptides were separated on a  $125\ \mu\text{m} \times 18\ \text{cm}$  hand-pulled fused silica microcapillary column with a needle tip diameter of  $<10\ \mu\text{m}$  and was packed with  $3\text{-}\mu\text{m}$   $200\ \text{\AA}$  Maccel C18 AQ beads. The column was equilibrated with buffer A (3% ACN + 0.125% FA). Peptides were loaded onto the column at 100% buffer A. Separation and elution from the column was achieved using a 32-min 0%–42% gradient of buffer B (100% ACN + 0.125% FA). The total LC-method with loading, separation, and column equilibration was 50 min. The Exactive-Orbitrap MS was operated using the following

parameters: AGC,  $3 \times 10^6$ ; resolution,  $5 \times 10^4$ ; m/z range, 350–1000; maximum ion time, 500 ms; and lock masses, 371.1012 and 445.1200 m/z. LC-MS data analysis was performed using Pinpoint software (Thermo Fisher Scientific) with manual validation of peptide masses (Figure S1G). MS1 intensities from Pinpoint were exported as a .CSV file for further analysis in Excel and GraphPad Prism. Total Ub was determined as the average of the total Ub calculated for each individual locus (Phu et al., 2011). For UB chain synthesis kinetics, data were further analyzed in GraphPad Prism and linear regression analysis was performed to fit slopes with quantitative MS data.  $R^2$  is the coefficient of determination and the 95% confidence intervals are indicated in dotted lines.

### **S65-PARKIN AQUA proteomics**

Heavy-labeled reference peptides for S65-PARKIN (Figure S1G) were from JPT Peptides Technologies (SpikeTides™\_TQL Proteotypic Peptides). S65-PARKIN AQUA peptides (non-phospho and phospho heavy peptide) were reduced (10 mM TCEP) and alkylated (20 mM chloroacetamide), dried down and resuspended in 5% FA. The desired amount of AQUA peptide was mixed with previously TCA precipitated sample prior to Lys-C and Trypsin enzymatic digestion (in 100 mM TEAB, 0.1% Rapigest, 10% ACN). Samples were then handled as previously described in the UB-AQUA samples section. MS1 signal for both cleaved and miss-cleaved form of S65-peptide (NDWTVQNCDLDQQSIVHIVQR, NDWTVQNCDLDQQSIVHIVQRPWR) were measured and monitored in Pinpoint software.

### **Immunoprecipitation of PARKIN and p-S65-PARKIN quantification**

Hela Flp-In T-REx cells at 80% confluence expressing Flag-HA-PARKIN or catalytically inactive PARKIN<sup>C431S</sup> mutant, were treated with doxycycline (0.5  $\mu$ g.ml) for 16 hours and

then treated with Antimycin A (10  $\mu$ M) and Oligomycin A (5  $\mu$ M) for the time indicated. Cells from 2x15 cm dishes were washed twice with ice cold PBS and lysed in 3 ml of lysis buffer supplemented with protease and phosphatase inhibitors. Whole cell extracts were sonicated, clarified by centrifugation (16000xg for 10 min at 4°C), filtered through 0.45 $\mu$  filters (Sartorius) and protein concentrations determined by the Bradford assay. Parkin from whole cell extracts (14 mg) was immunoprecipitated with 75  $\mu$ l Anti-FLAG M2 Magnetic Beads (Sigma) for 4 hours at 4°C. Beads were washed 3 times with lysis buffer containing 500 mM NaCl and twice with 50 mM Tris pH 8.0, 150 mM NaCl. Elution with 3xFlag peptide (250  $\mu$ g/ml) diluted in 50 mM Tris pH 8.0, 150 mM NaCl, was performed twice (375  $\mu$ l for 10 min), eluates were combined and reductively carboxymethylated, and precipitated with 20% trichloro-acetic acid (TCA). TCA-precipitated proteins were then subject to the AQUA proteomic workflow.

### **Video microscopy analysis of GFP-PARKIN translocation**

The methods for generation of cells expressing inducible GFP-PARKIN and mutant proteins, depolarization and imaging are provided in the main text. In order to determine translocation of GFP-PARKIN to mitochondria (marked by RFP expression), the following method was developed and implemented.

**Nuclear segmentation:** Manual seeding of nuclear locations enabled the algorithm to detect partial nuclei on the edges of a given field, (cell # 1 in [Figure S2D-F](#)). The contribution of data extracted from partial cells around the image border was not critical to the statistics of the final results. However, including the nuclear mask for those partial cells ensured that the algorithm did not associate mitochondria regions from the partial cells with their neighboring cells (mitochondria from cell # 1 will be associated with cell # 2 in [Figure S2D-F](#)). If not taken into account, cell-to-cell variability in absolute signal level and translocation kinetics in conjunction with this potential mis-assignment could

significantly affect the accuracy of individual cells' correlation measurements. Therefore, along with manual seeding points, nuclear masks were generated using an edge-based approach for all cells in a field of view. First steerable filter (Ridler et al., 1978) was applied to the DAPI images to generate non-maximum suppressed (NMS) response images as depicted in [Figure S2G,H](#). A series of threshold values was determined by calculating the intensity values in the NMS images stepping down from the 99<sup>th</sup> to 96<sup>th</sup> percentile. For each threshold value, the algorithm thresholds the NMS images and detects enclosed rings that represent nuclear boundaries by performing a morphological operation on the thresholded NMS images. Enclosed rings that satisfy the size and roundness criteria and also enclose one seeding point are kept. By looping through all NMS image thresholds from high to low, the algorithm identified on average more than 90% of seeded nuclei. For the remaining nuclei for which the algorithm failed to detect a matching object, a sphere with average nuclear radius was placed on top of each seeding point. Normally those seeding points represented nuclei with either very low DAPI signal or sitting on the image border.

**Correction for mis-alignment between channels:** Slight mis-alignment of the GFP-PARKIN and mitochondria channels caused by chromatic aberration was detected upon image overlay. To ensure that this would not undermine the correlation analysis, this was corrected at each time point by using the mitochondria channel as the reference image upon which the GFP-PARKIN image was shifted to determine the maximum overlay through image correlation.

**GFP-PARKIN channel segmentation:** To obtain the mask for the regions of each cell from which the correlation between GFP-PARKIN and RFP-mitochondria channels was computed, a threshold was determined using the Ridler-Calvard method (Ridler et al., 1978) on a Gaussian-smoothed GFP-PARKIN image. The thresholded GFP-PARKIN image was then watershed segmented based on the nuclear mask from the fixed DAPI

image. Though the resultant masks do not closely follow the actual cell boundaries, they enclose the neighborhood of all mitochondria in cells with detectable GFP-PARKIN expression. Cells expressing no or very low-level GFP-PARKIN are not detected by the algorithm and therefore not scored.

**Time trace smoothing and fitting:** Before fitting the time traces, each line was smoothed using the MATLAB build-in spline fitting function. The smoothed time traces were then fed to a fitting function available through MATLAB central (<http://www.mathworks.com/matlabcentral/fileexchange/4363-doseresponse>) that is designed to fit dose response data to sigmoid curves. This function fits four parameters that are the minimum and maximum plateau values, the EC50 values ( $T_{50}$  in our case) and the Hill coefficient. In order to ensure the fitting converges for all traces, we decided to constrain the minimum and maximum plateau values to be the minimum and maximum values within the spline smoothed data, and only fit the remaining two parameters. A typical time trace, along with its spline smoothed curve and sigmoid function fitted curve are shown in **Figure S2I**.

### **Protein Expression, Purification, and Phosphorylation**

Human full-length Parkin DNA was codon-optimized for E.coli expression (Invitrogen) and subcloned into pOPIN-K vector for bacterial expression (Berrow et al., 2007) or pFL plasmid (multibac system) for expression in insect cells (Bieniossek et al., 2008). PCR mutagenesis was used to generate all constructs containing point mutation. GST-PreScission-PARKIN and mutants were expressed in BL21-pLys (DE3) E. coli cells using conditions previously described (Kondapalli et al., 2012; Wauer et al., 2013). Baculovirus encoding for 6his-GST-PreScission-PARKIN wild-type and mutants were generated following the multibac system protocol and protein were expressed in Sf9 or High Five cells. Human PARKIN and mutants were expressed in insect cells at 27

degrees for 48-72 hours post infection. Proteins were purified by GST-Sepharose 4B (GE healthcare) and eluted with 20 mM reduced glutathione in 20mM Tris/HCl, 150 mM NaCl, 2 mM DTT, pH 7.5. When necessary, eluted proteins were cleaved with 3c protease overnight at 4°C and/or applied onto Superose 6 10/300 GL (GE healthcare) in 25 mM Tris-HCl pH 8.0, 200 mM NaCl, 0.5 mM TCEP. The peak containing cleaved PARKIN were collected and concentrated. *Rattus norvegicus* full-length Parkin DNA was codon-optimized for E.coli expression (Invitrogen) and the UBL domain (1-85) subcloned into pOPIN-K vector for bacterial expression. Rat UBL domain was expressed and purified from e.coli as described above for human PARKIN.

Human Ubiquitin DNA was subcloned into a modified pDEST-60 vector encoding for Ubiquitin-6His-tag. Ubiquitin-6His-tag wild-type and mutants were produced in Rossetta (DE3) E. coli cells and purified by Ni-NTA followed by removal of the c-terminal 6His-tag by incubation with GST-USP2cd (1.5  $\mu$ M). Ubiquitin was filtered through a 30kDa Vivaspin filter to remove GST-USP2cd, concentrated in a 3 kDa molecular-mass cut-off filter device, and loaded on a gel-filtration Superose 6 10/300 GL (GE healthcare). Plasmid encoding for GST-tagged Rat USP2[271-618] (USP2cd) was a gift from Philip Cohen (University of Dundee).

*Tribolium castaneum* PINK1 (PINK1Tc) [a gift from M. Muqit, MRCPPU, University of Dundee] was expressed as a 6HIS-MBP fusion in BL21 (DE3) Rosetta cells (Kondapalli et al., 2012). Cells were lysed in 1xPBS, 15 mM imidazole, 1 mM EDTA, 1 mM EGTA, 1% (v/v) Triton X-100, 0.1% (v/v) 2-mercaptoethanol and 1 mM Benzamidine. 6HIS-MBP-PINK1 was affinity purified on NiNTA resin and eluted with 1xPBS, 250mM imidazole, 0.1mM EGTA, 0.25% (v/v) Triton X-100, 0.1% (v/v) 2-mercaptoethanol, 1mM Benzamidine and 0.1mM PMSF. Fractions were dialyzed into 50 mM Tris-HCl (pH 7.6),

150 mM NaCl, 0.1 mM EGTA, 0.25% (v/v) Triton X-100, 0.1% (v/v) 2-mercaptoethanol and 10% glycerol.

Two methods were used for phosphorylation by PINK1Tc and subsequent purification. In Method 1, GST-PARKIN was eluted from GSH-Sepharose, incubated with PINK1Tc at a 6:1 ratio (6 h) prior to re-capture of GST-PARKIN on GSH-beads. After washing, GST-PARKIN was proteolyzed with PreScission protease to remove GST and PARKIN purified by gel filtration. In Method 2, fractions containing GST-PARKIN were purified by gel filtration chromatography in 25 mM Tris-HCl (pH 7.6), 200 mM NaCl, 1 mM DTT. PARKIN to be phosphorylated was proteolyzed to remove GST, diluted and applied to a Q-sepharose column and eluted with a linear salt gradient. Fractions were concentrated (Amicon Ultra) and further purified by gel filtration chromatography. The cleaved PARKIN (30  $\mu$ M) was incubated with 6  $\mu$ M PINK1Tc for 3 h at 30°C in 50 mM Tris-HCl (pH 7.6), 10 mM MgCl<sub>2</sub>, 5 mM ATP, 0.1 mM EGTA and 2 mM DTT. Phosphorylated PARKIN (p-WT PARKIN or PARKIN<sup>S65A</sup> or PARKIN<sup>C431S</sup> treated in the same manner) was purified by Q-sepharose in 25 mM Tris-HCl (pH 8.0), 1 mM DTT using a linear salt gradient. The stoichiometry of PARKIN and UB phosphorylation was determined by AQUA proteomics using peptides that map to the pS65 locus of each of the respective proteins. UB (Boston Biochem) or the indicated UB mutant were phosphorylated at 30°C in 50 mM Tris-HCl (pH 7.6), 10 mM MgCl<sub>2</sub>, 5 mM ATP, 0.1 mM EGTA and 2 mM DTT. 20  $\mu$ M UB was incubated with 4  $\mu$ M PINK1Tc for 24 h. Phosphorylated UB (p-UB) was purified by gel filtration chromatography in 25 mM Tris-HCl (pH 7.6), 200 mM NaCl, 1 mM DTT, buffer exchanged into pure water using a PD10 desalting column (GE Healthcare), applied to a Q-sepharose column and eluted with 50 mM Tris-HCl (pH 7.6). The extent of UB phosphorylation at S65 was determined by UB-AQUA, electrophoresis

on PhosTag gels, and intact mass analysis. Intact mass measurements were performed using nano-electrospray ionization and time-of-flight mass spectrometry (Waters LCT Premier XE MS) by the St. Jude Proteomics Facility.

After purification on GSH-Sepharose, the UBL domain from rat PARKIN was cleaved, cleaned up by ion exchange and then sizing. The UBL domain from rat PARKIN was phosphorylated under the same conditions as for p-UB. Reaction was run over sizing to clean it up (final buffer 25mM Tris 7.6/200mM NaCl). The extent of rat UBL domain phosphorylation (p-UBL) (>98%) was determined by electrophoresis on native gel as well as PhosTag gels.

Halo-tag-4xUBQLN1<sup>UBA</sup> resin was prepared as in (Emmerich et al., 2013 and the plasmid was a generous of P. Cohen, MRCPPU, University of Dundee) with the following modifications: a 6his-tag was added N-terminal to the Halo-tag and upon expression in Rossetta (DE3) E. coli cells, was purified by Ni-NTA and stored at 80°C. Covalent coupling of Halo-4xUBA<sup>UBQLN1</sup> to the resin was done by mixing 5 mg of purified Halo-4xUBA<sup>UBQLN1</sup> to 1 ml of HaloLink resin.

All purified proteins used in experiments were run on SDS-PAGE, followed by staining with Colloidal Coomassie Blue for quality control.

### **In vitro ubiquitination analysis and UB AQUA proteomics**

Unless specified in the figure legends, all ubiquitylation experiments were performed as follows. E1 (UBE1 0.1  $\mu$ M), E2 conjugating enzyme (UBE2L3 1  $\mu$ M), E3 ligase (PARKIN 1 or 2  $\mu$ M), total UB (30  $\mu$ M) were incubated for the indicated time at 30°C in a 25  $\mu$ l reaction mixture containing 50 mM Tris/HCl (pH 7.5), 5 mM MgCl<sub>2</sub>, 0.2 mM TCEP. The reaction was started by the addition of 2 mM ATP and terminated by the addition of SDS sample buffer containing 10 mM EDTA when analyzed on SDS-PAGE or by the addition



of 10 mM EDTA and TCA (20% final) precipitated when the reaction was further analyzed by mass spectrometry (see UB AQUA section). When PARKIN had to be activated by PINK1Tc prior to ubiquitylation assay, 2  $\mu$ M PARKIN was incubated with 0.1  $\mu$ M MBP-PINK1Tc for 60 min at 30°C in a 20  $\mu$ l reaction mixture containing 50 mM Tris/HCl (pH 7.5), 5 mM MgCl<sub>2</sub>, 0.1 mM EGTA, 0.5 mM TCEP, 2 mM ATP). After 60 min, ubiquitylation components (E1, E2, Ub) diluted in 50 mM Tris/HCl (pH 7.5), 5 mM MgCl<sub>2</sub>, 0.2 mM TCEP, were added to the samples and incubated for a further 45 min at 30°C. Reaction were stopped by the addition of SDS sample buffer containing 10 mM EDTA when analyzed on SDS-PAGE or by the addition of 10 mM EDTA and TCA (20% final) precipitated when the reaction was further analyzed by mass spectrometry (see UB AQUA section). For Figure S4 E-G, the minimal amount of E2 necessary for the assay was first determined in order to avoid any artifactual PARKIN-independent chain formation that occur with higher than necessary concentration of E2s and can complicate interpretation of results.

### **In vitro Deubiquitination assay**

Unless specified in the figure legends, all deubiquitination experiments were performed as follows: DUBs were diluted in DUB buffer (50 mM Tris-HCl (pH 7.5), 50 mM NaCl, 5 mM DTT), incubated at 25°C for 10 min for activation. Kinase and ubiquitylation assays were setup as described above and reactions were stopped by the addition of 10 mM EDTA. Aliquots (15  $\mu$ l) of ubiquitylation assay were mixed with indicated amount of DUBs to a final volume of 30  $\mu$ l with reaction mixture containing 50 mM Tris-HCl (pH 7.5), 50 mM NaCl, 5 mM DTT. The reaction was then incubated for the time indicated at 30°C with gentle agitation and terminated by the addition of SDS sample buffer. Free M1 or K48-linked recombinant poly-UB chains (2-7) were used as positive controls for

OTULIN and USP5 activity. Ubiquitin chain cleavage was detected by immunoblotting using a polyclonal anti-UB antibody.

### **Binding and Affinity Measurements**

Isothermal calorimetry measurements were made on an ITC200 (MicroCal). PARKIN, p-WT PARKIN and p-UB were buffer exchanged into 25 mM Hepes (pH 7.0), 200 mM NaCl, 1 mM 2-mercaptoethanol using Nap5 desalting columns (GE Healthcare). Proteins were concentrated to 15  $\mu$ M (PARKIN and p-PARKIN) and 150  $\mu$ M (p-UB). p-UB was titrated against either PARKIN or p-PARKIN in the sample cell at a constant temperature of 18°C. Sixteen titration measurements were made and the data were analyzed using Origin software provided by MicroCal. Bio-layer interferometry (BLI) measurements were made on an Octet RED96 (ForteBio). GST-PARKIN was immobilized on a GST-capture biosensor equilibrated in 20 mM Tris-HCl (pH 7.6), 200 mM NaCl, 0.1 mg/mL BSA and 0.01% Tween. Equilibrated biosensors were exposed to 0.1-4.0  $\mu$ M pUB for 40 sec followed by a 60 sec dissociation period in buffer. Affinity measurements were performed using data analysis software provided by ForteBio and fit in Prism5 (Graphpad Software). The mass of PARKIN and the mass/stoichiometry of PARKIN/p-UB complexes was measured by size exclusion chromatography (Superose 6, 10/300 GL) mounted on a high-pressure liquid chromatography system (1260 Infinity, Agilent) coupled to in-line Multi-Angle Light Scattering (SECMALS) (Wyatt DAWN HELEOS II) with in-line refractive index detection (Wyatt Optilab T-rEX). The wavelength used was 658 nm and the calibration constant was  $2.32950e-4$  1/(V cm). The column was equilibrated with 25 mM Tris pH 8.0, 200 mM NaCl, 2 mM DTT and experiments were conducted at 25 °C. The injected sample volume was 50  $\mu$ l and experiments were conducted at a flow rate of 0.4 ml/min. Eluted protein was detected via light scattering and refractive index and data were recorded and analysed with Wyatt Astra software

(version 6). We acknowledge the generous assistance of Steve Harrison and Yoana Dimitrova (Harvard Medical School for assistance in SEC-MALS analyses. To examine reaction of PARKIN with UB-VS, the indicated proteins were incubated in reaction buffer (25mM Tris pH 7.6, 50mM NaCl and 5mM DTT) and samples removed over time prior to analysis by SDS-PAGE.

### **Generation of PINK1 Knockout HeLa Flp-In T-REx cell line**

To generate PINK1 knockout (KO) cells, a PINK1 KO TALEN pair (Human-H73593\_TALEN\_L1 and R1, target site: TGGGCCGCAGGACCGGGCGC GGAGCCTCGCAGGGTCTGGGCTCGGGCTCCCTA) was purchased from [Toolgen.com](http://Toolgen.com). HeLa Flp-In T-REx/PARKIN cells were then transfected with TALEN\_L1, TALEN\_R1 and flag-GFP constructs at the ratio of 2:2:1 by using lipofectamine 2000. After 48h, cells with the top 1% GFP signal intensity were single-cell sorted in 96-well plate using a BD FACSAria at the DFCI flow cytometry facility. To screen PINK1 KO clones, PCR-based genotyping was performed as follow. Primers encompassing TALEN target site (forward: GGCAGCGGCGGCTGCGGGGG, reverse: CCGCCGGCTCTCCGCCTGTTTTTCC) were used to amplify the target region from the genomic DNA isolated from each clone. Upon amplification, PCR products were subjected to sequencing at the DF/HCC DNA resource core to confirm the PINK1 KO clone. To further verify its deletion, western blotting against PINK1 was performed as well.

### **Whole cell lysate pS65-UB measurement**

Parental HeLa Flp-In T-REx/PARKIN cells (PINK1+/+) and PINK1 -/- HeLa Flp-In T-REx/PARKIN cells at 80% confluence, were treated with DMSO or with Antimycin A (10  $\mu$ M) and Oligomycin A (5  $\mu$ M) for an hour. Cells from 2x15 cm dishes were washed twice with ice cold PBS and harvested in 10 mM Tris-HCl, pH 7.5, 10 mM KCl, 1.5 mM MgCl<sub>2</sub>,

10 mM glycerol 2-phosphate, 50 mM sodium fluoride, 5 mM sodium pyrophosphate, 0.5 mM EGTA, 1 mM sodium orthovanadate, 5 mM TCEP, 1 mM PMSF, 1 µg/mL aprotinin, 1 µg/mL leupeptin and phosphatase inhibitor cocktail. Extracts were briefly sonicated and recombinant USP2cd was added to a final concentration of 0.5 µM. Samples were incubated at 30°C with shaking at 1100 r.p.m. for two hours. After centrifugation at 20000 x g for 15 minutes, the supernatants were heated at 95°C for 20 minutes to denature and precipitate the majority of cellular proteins. Protein concentration of the heat-resistant supernatants containing ubiquitin was determined by bicinchoninic acid assay. Equal amount of samples were subject to TCA precipitation and digested overnight at 37°C with Lys-C and trypsin (in 100mM TEAB, 0.1% Rapigest, 10% ACN). Measurement of pS65-UB was done as described in the UB-AQUA section.

#### **In vitro PARKIN binding to 6his-UB chains experiments**

K48- or K63-linked 6his-UB<sup>(2-7)</sup> chains were incubated with MBP-PINK1Tc or catalytically inactive MBP-PINKTc[D359A] at 30°C in a 100 µl reaction mixture containing 50 mM Tris/HCl (pH 7.5), 5 mM MgCl<sub>2</sub>, 0.1 mM EGTA, 0.5 mM TCEP, 1 mM ATP for 60 min with shaking at 1100 r.p.m. When needed, recombinant wild-type PARKIN or indicated mutants were phosphorylated in a parallel kinase assay reaction with MBP-PINK1Tc, similarly to 6his-UB<sup>(2-7)</sup> chains. After 60 min, MBP-PINK1Tc was removed by affinity purification using amylose resin. Phosphorylated or unphosphorylated 6his-UB<sup>(2-7)</sup> chains (3 µg) were mixed with wild-type PARKIN (1 µg) or indicated mutants in 300 µl reaction mixture containing 25 mM Hepes (pH 7.5), 1 mM EGTA, 2 mM MgCl<sub>2</sub>, 0.5% (vol/vol) Triton X-100 (binding buffer) plus 150 mM NaCl and incubated for 30 min at 25°C. After 30 min 6his-UB<sup>(2-7)</sup> chains were captured by adding nickel-charged affinity resin (10 µl pack beads) and incubated for a further 15 min, after which beads were washed three times with 1 mL of buffer plus 250 mM NaCl and once with buffer without NaCl and

Triton X-100. Bound proteins were released by denaturation with 1% LDS, the beads were removed by centrifugation for 1 min at 2,000 × g, and the supernatants were heated for 5 min at 75 °C and subjected to SDS/PAGE.

### **Evolution of phospho-specific antibodies for S65 in PARKIN**

The phospho-specific S65 antibodies were isolated from a recently developed phospho-specific antibody library (Koerber et al., 2013) using standard phage display protocols. Selections were performed using a biotinylated phosphopeptide antigen [Biotin-linker-DLDQQpSIVHIVQR-amide] captured with streptavidin-coated magnetic beads (Promega). Three rounds of selection were performed with decreasing amounts of peptide antigen (500, 250, and 100 nM) and individual phage clones from the third round of selection were analyzed by ELISA. Briefly, 96-well Maxisorp plates were coated with 10 µg/mL NeutrAvidin overnight at 4°C and subsequently blocked with 0.5% BSA for two hours at 20°C. Plates were then incubated with either 250 nM phosphorylated peptide, 250 nM nonphosphorylated peptide, or buffer only. Serial dilutions of phage were captured on the peptide-coated wells for fifteen minutes and bound phage were then detected using a horseradish peroxidase (HRP)-conjugated anti-M13 monoclonal (GE Healthcare). Selected phospho-specific scFv clones were subsequently cloned into a bacterial expression vector with an Avi-tag that enables *in vivo* biotinylation. ScFvs were then expressed in the C43 (DE3) bacterial strain and purified via Protein A chromatography.

### **Phosphoproteomic analysis of PINK1 KO MEFs**

WT and PINK1<sup>-/-</sup> MEFs were grown in DMEM with 10% bovine serum and treated with Antimycin A (10 µM) and Oligomycin A (5 µM) for the indicated time period, prior to the

purification of mitochondria as described (Bozidis et al., 2007). Mitochondria were lysed and digested with LysC and trypsin, prior to selection of phosphopeptides as described (Kettenbach and Gerber, 2011). Peptides derived from the indicated times after depolarization were subjected to 10-plex TMT analysis in triplicate and analyzed on an LTQ Orbitrap Velos or Elite (Thermo Scientific San José, CA) mass spectrometer using MS<sup>3</sup>-based reporter ion quantification (Ting et al., 2011; McAlister et al., 2012). For quantification, a 0.03 *m/z* window centered on the theoretical *m/z* value of each ten reporter ions and the closest signal intensity from the theoretical *m/z* value was recorded. Reporter ion intensities were further de-normalized based on their ion accumulation time for each MS<sup>3</sup> spectrum and adjusted based on the overlap of isotopic envelopes of all reporter ions (manufacturer specifications). Total signal to noise values for all peptides were summed for each TMT channel, and all values were adjusted to account for variance in sample handling. For each peptide, a total minimum signal to noise value of 100 was required (Ting et al., 2011; McAlister et al., 2012).

## SUPPLEMENTAL REFERENCES

Beausoleil, S.A., Villen, J., Gerber, S.A., Rush, J. and Gygi, S.P. (2006) A probability-based approach for high-throughput protein phosphorylation analysis and site localization. *Nat. Biotechnol.* 24:1285-1292.

Berrow, N.S., Alderton, D., Sainsbury, S., Nettleship, J., Assenberg, R., Rahman, N., Stuart, D.I., and Owens, R.J. (2007) A versatile ligation-independent cloning method suitable for high-throughput expression screening applications. *Nucleic Acids Res.* 35:e45.

Bieniossek, C., Richmond, T.J., and Berger, I. (2008) MultiBac: multigene baculovirus-based eukaryotic protein complex production. *Curr. Protoc. Protein Sci.* Chapter 5; Unit 5.20.

Bozidis, P., Williamson, C.D., and Colberg-Poley, A.M. (2007) Isolation of endoplasmic reticulum, mitochondria, and mitochondria-associated membrane fractions from transfected cells and from human cytomegalovirus-infected primary fibroblasts. *Curr Protoc Cell Biol.* Chapter 3:Unit 3.27.

Elias, J.E. and Gygi, S.P. (2007) Target-decoy search strategy for increased confidence in large-scale protein identifications by mass spectrometry. *Nat. Methods* 4:207-214.

Emmerich, C.H., Ordureau, A., Strickson, S., Arthur, J.S., Pedrioli, P.G., Komander, D., and Cohen, P. (2013) Activation of the canonical IKK complex by K63/M1-linked hybrid ubiquitin chains. *Proc Natl Acad Sci U S A.* 110:15247-15252.

Huttlin, E.L., Jedrychowski, M.P., Elias, J.E., Goswami, T., Rad, R., Beausoleil, S.A., Villen, J., Haas, W., Sowa, M.E., and Gygi, S.P. (2010) A Tissue-Specific Atlas of Mouse Protein Phosphorylation and Expression. *Cell* 143:1174–1189.

Kettenbach, A.N. and Gerber, S.A. (2011) Rapid and reproducible single-stage phosphopeptide enrichment of complex Peptide mixtures: application to general and

phosphotyrosine-specific phosphoproteomics experiments. *Anal. Chem.* **83**:7635-7644.

Koerber, J.T., Thomsen, N.D., Hannigan, B.T., Degrado, W.F., and Wells, J.A. (2013) Nature-inspired design of motif-specific antibody scaffolds. *Nat. Biotechnol.* **31**:916-921.

Kondapalli, C., Kazlauskaitė, A., Zhang, N., Woodroof, H.I., Campbell, D.G., Gourlay, R., Burchell, L., Walden, H., Macartney, T.J., Deak, M., Knebel, A., Alessi, D.R., and Muqit, M.M. (2012) PINK1 is activated by mitochondrial membrane potential depolarization and stimulates Parkin E3 ligase activity by phosphorylating Serine 65. *Open Biol.* **2**:120080.

Matsumoto, M.L., Wickliffe, K.E., Dong, K.C., Yu, C., Bosanac, I., Bustos, D., Phu, L., Kirkpatrick, D.S., Hymowitz, S.G., Rape, M., Kelley, R.F., and Dixit, V.M. (2010) K11-linked polyubiquitination in cell cycle control revealed by a K11 linkage-specific antibody. *Mol Cell* **39**:477-484.

McAlister, G.C., Huttlin, E.L., Haas, W., Ting, L., Jedrychowski, M.P., Rogers, J.C., Kuhn, K., Pike, I., Grothe, R.A., Blethrow, J.D., and Gygi, S.P. (2012) Increasing the multiplexing capacity of TMTs using reporter ion isotopologues with isobaric masses. *Anal. Chem.* **84**:7469-7468.

Phu, L., Izrael-Tomasevic, A., Matsumoto, M.L., Bustos, D., Dynek, J.N., Fedorova, A.V., Bakalarski, C.E., Arnott, D., Deshayes, K., Dixit, V.M., Kelley, R.F., Vucic, D., and Kirkpatrick, D.S. (2011) Improved quantitative mass spectrometry methods for characterizing complex ubiquitin signals. *Mol Cell Proteomics* **10**:M110.003756.

Ridler, T.W., and Calvard, S. (1978) Picture thresholding using an iterative selection method. *IEEE Transactions on Systems, Man and Cybernetics* **8**:630-632.

Sarraf, S.A., Raman, M., Guarani-Pereira, V., Sowa, M.E., Huttlin, E.L., Gygi, S.P., and Harper, J.W. (2013) Landscape of the PARKIN-dependent ubiquitylome in response to mitochondrial depolarization. *Nature* **496**:372-376.

Sowa, M.E., Bennett, E.J., Gygi, S.P., Harper, J.W. (2009) Defining the human deubiquitinating enzyme interaction landscape. *Cell* **138**:389-403.



Ting L, Rad R, Gygi SP, Haas W. (2011) MS3 eliminates ratio distortion in isobaric multiplex quantitative proteomics. *Nat. Methods* 8:937-940.

Wauer, T., and Komander, D. (2013). Structure of the human Parkin ligase domain in an autoinhibited state. *EMBO J* 32, 2099-2112.
